# Supplementary material for: How Self-Directed e-Learning Contributes to Training for Medical Licentiate Practitioners in Zambia: Evaluation of the Pilot Phase of a Mixed-Methods Study
Source: PubMed Central journal article supplement (PMC6290268; doi:10.2196/10222), 2018-11-27
Supplement: mededu_v4i2e10222_app3.pdf [file mededu_v4i2e10222_app3.pdf]

## Multimedia Appendix 3. Knowledge Assessment: Pre-Test

### 1. CNS

- a. List 3 commonest CNS opportunistic infections in HIV.
- b. Classify the different types of epilepsy.

### 2. HIV

- a. What are the first-line treatment guidelines in Zambia?
- b. What do you understand by the term option B+?
- c. What are the 3 diagnostics for HIV treatment failure?

### 3. Malaria

- a. List 3 common complications of severe Malaria.
- b. List 2 presentations of each common complication of severe Malaria.
- c. Indicate the treatment guidelines for these complications.

### 4. Cardiovascular diseases

- a. Please explain major stroke classifications.
- b. What type of stroke is most common?
- c. What are risk factors for stroke? List at least 3.
- d. What are symptoms for a stroke? List at least 3.
- e. List (and explain) important elements for stroke management.

### 5. Diabetes

- a. Please explain common clinical features of diabetic foot ulcers.
- b. What are the underlying causes of diabetic foot ulcers and what are immediate causes?
- c. What is the most common site of a diabetic foot ulcer?
- d. List three components of diabetic foot assessments.
- e. List 3 complications of diabetic foot ulcer
- f. List (and explain) important elements for diabetic ulcer management.
