# Supplementary material for: How Self-Directed e-Learning Contributes to Training for Medical Licentiate Practitioners in Zambia: Evaluation of the Pilot Phase of a Mixed-Methods Study
Source: PubMed Central journal article supplement (PMC6290268; doi:10.2196/10222), 2018-11-27
Supplement: mededu_v4i2e10222_app6.pdf [file mededu_v4i2e10222_app6.pdf]

Multimedia Appendix 6: Exemplary diary entry of ML student

| January 2016/February 2016                                            |                 |          |                  |
|-----------------------------------------------------------------------|-----------------|----------|------------------|
| Week 4: 25 <sup>th</sup> January 2016 – 31 <sup>st</sup> January 2016 |                 |          |                  |
| Date                                                                  | Activity        | Duration | Comments         |
| 25/1/16                                                               | Neck swellings  | 2 hours  | Able to access   |
| 28/1/16                                                               | Ludwig's angina | 1 hour   | Good information |

  

| Week 5: 1 <sup>st</sup> February 2016 – 7 <sup>th</sup> February 2016 |                          |            |                                              |
|-----------------------------------------------------------------------|--------------------------|------------|----------------------------------------------|
| Date                                                                  | Activity                 | Duration   | Comments                                     |
| 03/02/16                                                              | Thyroid disorders        | 1h 30m     | Information summarized                       |
| 08/02/16                                                              | Intestinal obstruction   | 2 hours    | well summarized                              |
| 05/02/16                                                              | Hernias                  | 50 minutes | Information summarized<br>easy to understand |
| 07/02/16                                                              | Primary surgery<br>vol 1 | 20 minutes | unable to access                             |
| 07/02/16                                                              | Primary surgery<br>vol 2 | 10 minutes | unable to access                             |

  

| February 2016                                                          |                               |          |                  |
|------------------------------------------------------------------------|-------------------------------|----------|------------------|
| Week 6: 8 <sup>th</sup> February 2016 – 14 <sup>th</sup> February 2016 |                               |          |                  |
| Date                                                                   | Activity                      | Duration | Comments         |
| 09/02/16                                                               | Tumours - benign<br>malignant | 1:30hrs  | well summarized  |
| 12/02/16                                                               | Burns                         | 3 hours  | Good information |
| 13/02/16                                                               | Acute abdomen                 | 2hrs     | Good information |

  

| Week 7: 15 <sup>th</sup> February 2016 – 21 <sup>st</sup> February 2016 |                   |          |                  |
|-------------------------------------------------------------------------|-------------------|----------|------------------|
| Date                                                                    | Activity          | Duration | Comments         |
| 15/02/16                                                                | Blood transfusion | 2 hours  | Good information |
| 17/02/16                                                                | Cataract          | 1:30hrs  | Good information |
| 17/02/16                                                                | Bio psias         | 2:30hrs  | well summarized  |
